# Supplementary material for: One-dimensional assembly of functional proteins: toward the design of an artificial cellulosome
Source: Royal Society of Chemistry journal article supplement (doi:10.1039/c5me00011d), 2016-01-01
Supplement: c5me00011d1.pdf [file c5me00011d1.pdf]

**Supporting information**

Table S1. Functional proteins prepared in this study

| Name                 | Abbreviation | Amino acid sequence of the C-terminal regions of the recombinant protein |
|----------------------|--------------|--------------------------------------------------------------------------|
| K-tagged CD(Tfu0901) | CD-CK        | -YPYDVPDYA-GGGS-MRHKGS-HHHHHH                                            |
| K-tagged EG(Tfu0901) | EG-CK        |                                                                          |
| K-tagged CBM         | CBM-CK       |                                                                          |

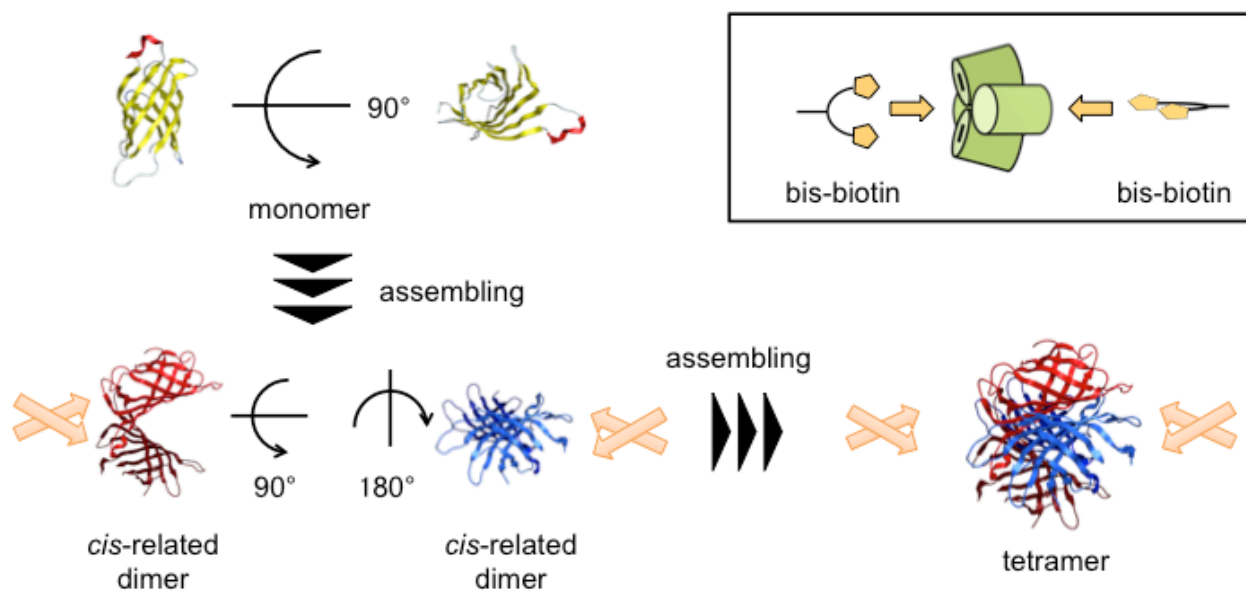

Fig. S1 SA forms a tetramer in its quaternary structure; the two monomer units (yellow) form a dimer (red and blue) with two biotin-binding sites facing the same direction, and the two dimer units are assembled into a tetramer facing the opposite direction at the right angles for the dimers. Based on its structure, using bis-biotin promotes the formation of one-dimensional structure.

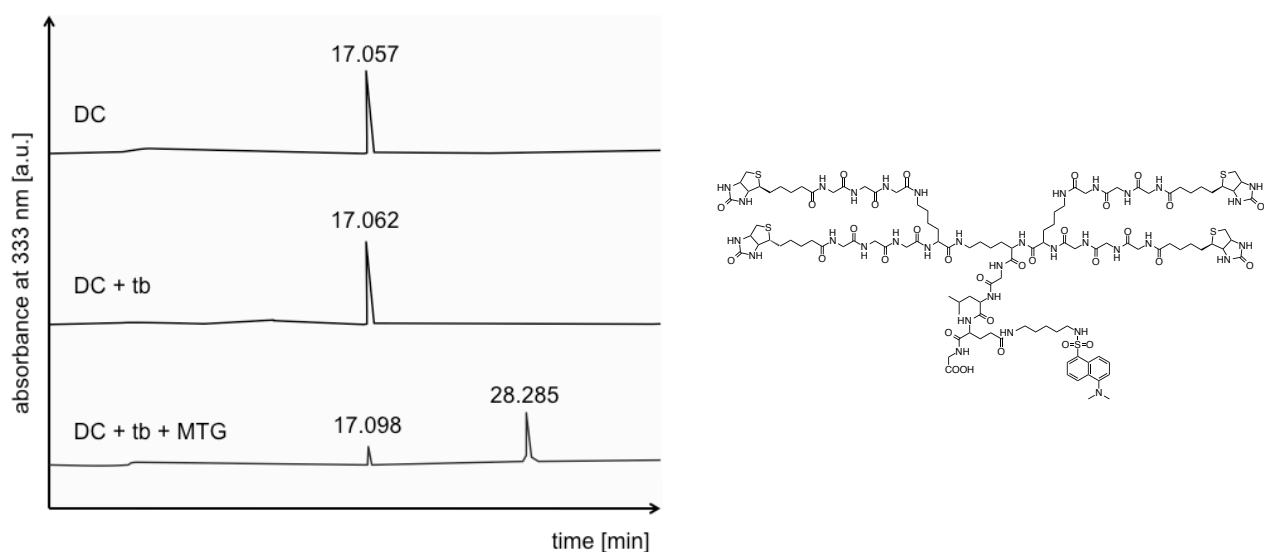

Fig. S2 The reactivity of Q-biotin<sub>4</sub> was examined with dansylcadaverine. Q-biotin<sub>4</sub> (20  $\mu$ M) and MTG (0.1 U/mL) were added to an aqueous solution dansylcadaverine (1  $\mu$ M in 10 mM phosphate buffer, pH 5.8) at 37  $^{\circ}$ C. After the enzymatic cross-linking reaction with MTG, the samples were analyzed with RP-HPLC (absorbance was monitored at 333 nm derived from dansylcadaverine). The analytical conditions were used as follows: column; Inertsil ODS-3 (GL Sciences, Inc., 4.6  $\times$  250 mm), mobile phase; CH<sub>3</sub>CN–H<sub>2</sub>O = 10:90 (0 min)  $\rightarrow$  50:50 (40 min). The dansylcadaverine was eluted at 17.1 min. After the MTG reaction, the new peak derived from the conjugates was appeared at 28.3 mL. DC; dansylcadaverine, tb; Q-biotin<sub>4</sub>. (left). MALDI-ToF MS; m/z: calculated for C<sub>114</sub>H<sub>177</sub>N<sub>33</sub>O<sub>31</sub>S<sub>5</sub>Na ([M+Na]<sup>+</sup>) 2689.1, found 2689.4. (right) the structure of the conjugate consisting of dansylcadaverine and Q-biotin<sub>4</sub>.

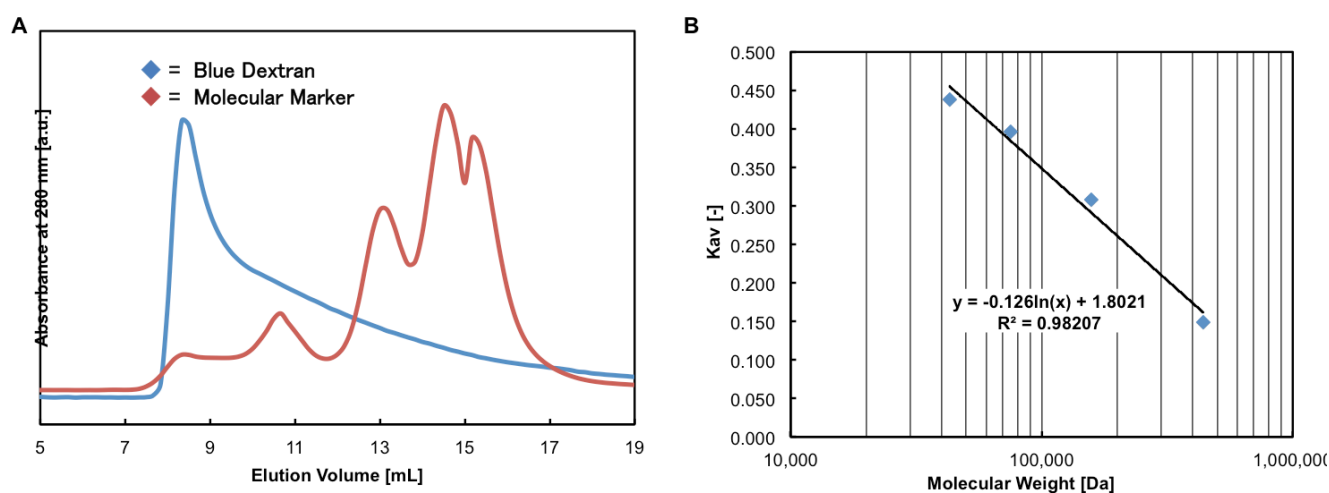

Fig. S3 Calibration of the molecular weight using the calibration results of the SEC column. (A) SEC chromatogram for the molecular weight markers and blue dextran eluting at the void volume. 1: Ferritin, 440 kDa; 2: Aldolase, 158 kDa; 3: Conalbumin, 75 kDa; 4: Ovalbumin, 43 kDa; (B) Standard curve for the molecular weight based on the results of SEC analysis of the molecular weight markers and blue dextran.

Table S2. SEC data regarding the molecular weight marker. (Content names, molecular weights, elution volumes, and  $K_{av}$ , the value was calculated from eq.1.)

|       | Content     | MW [Da] | $V_E$ [ml] | $K_{av}$ |
|-------|-------------|---------|------------|----------|
| 1     | Ovalbumin   | 43000   | 15.20      | 0.438    |
| 2     | Conalbumin  | 75000   | 14.55      | 0.397    |
| 3     | Aldolase    | 158000  | 13.16      | 0.308    |
| 4     | Ferritin    | 440000  | 10.67      | 0.149    |
| $V_0$ | BlueDextran | 2000000 | 8.33       | -        |

$$K_{av} = (V_E - V_0) / (V_C - V_0) \quad \dots\dots(\text{eq.1})$$

$V_c$  : Column Volume, 24 [ml].

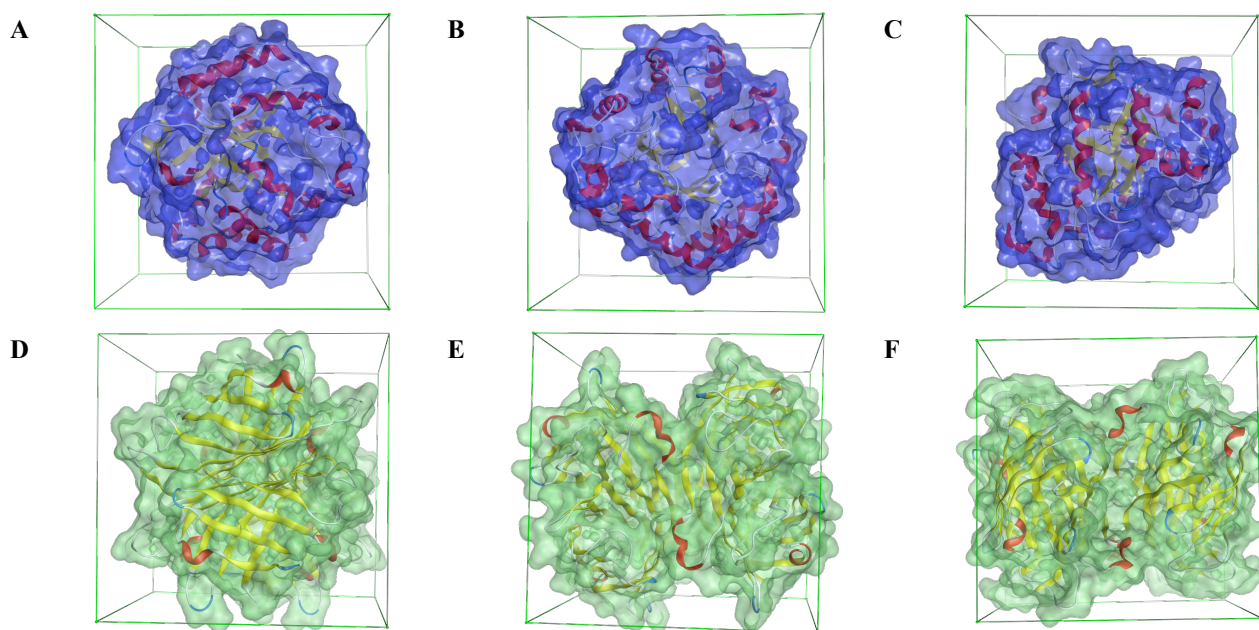

Fig. S4 The approximate size of CD (PDB: 2CKS) and SA (PDB: 1STP) with a molecular visualization software Molecular Operating Environment (Chemical Computing Group, Quebec, *Canada*). The image The size of green cube was Width 5 nm× Depth 5 nm× Height 5 nm. A front (A), side (B) and plane view (C) of CD. A front (E), side (F) and plane view (G) of SA. The surfaces of proteins were blue (CD) and green (SA).

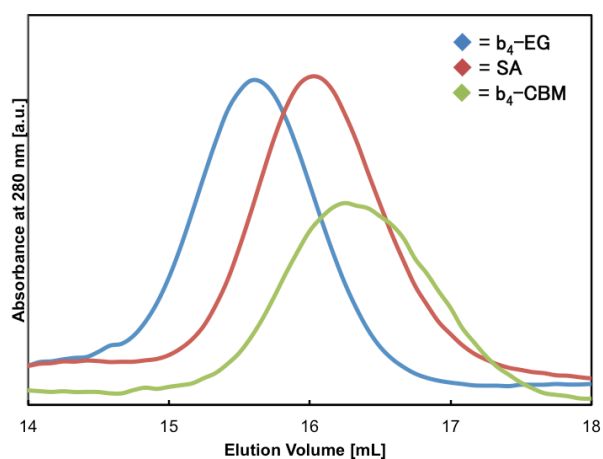

Fig. S5 The characterization of free protein units by size-exclusion chromatography. The proteins,  $b_4$ -EG (blue), SA (red) and  $b_4$ -CBM (green), were eluted at 15.3 mL, 16.0 mL and 16.3 mL, respectively.
